# Supplementary material
Source: Springer Nature journal article supplement (https://www.springermedizin.de/resource/supplementary/12958_2013_1144_MOESM3_ESM.pdf/9566906)
Supplement: MOESM3 [file 9566906]

NP\_001037797.1 : MAVTTPGTGMADLSATWENELLEQFSCLTANAEIEEESCLNTADFTWDSNDNTTGLIHLSDVFLVILRLNLEEM : 73  
Fbxxx : -----MALREDSSEDEIQCFSLSATSE-----FEVTESEEDTHGRSETGLIHLSDVFLVILRLNLEEM : 59  
XP\_002932171.1 : -----MAHTHEIFFLR----- : 11

NP\_001037797.1 : SLLRLGSTCSLLFRVSCNSLWTHFCDSFGVSLSNTNMGFVTAKTAFRLVFMWRSLFRNIHCNRAHQEKLF : 146  
Fbxxx : SLLRVGSTRCTHFRVSCNSLWIKHIQTSFGVPEA--TRAGSISAKSAFRLVFMWRSLFRNLHCNRSIQEKLF : 130  
XP\_002932171.1 : -----EFLVLFSAFHRSAGCLAFGSDER--TGCTDYTEKEAFKLLYMMGKLYKTLFCNRCIQDILF : 70

NP\_001037797.1 : LEIFQAPHKYWIQWLVLEESVPLPSVRLPESRIVEKLVGWTADLFQDKLQEKTEE-----CDTLKFEWRELYMFI : 214  
Fbxxx : AEIHFPPHKYVQWLVLEETVPLPSVRLPESRIVEKLVGWTADLFQDKLQEKTEE-----GRMLKFEWKELYMFI : 199  
XP\_002932171.1 : SGLBLK--RYWIQWLVLEEMVPLPFWQLIDQAIEDTWGINAGQIDKHKVTEESLEDVDNCLRYDQWKLHNM : 141

NP\_001037797.1 : ALCHHGSASLVFQHVLSCQCYNDHTELESMYHQYVQCRFQWLFYWLFRQPTPYNKQLRSIFLQWKHSKRRKV : 287  
Fbxxx : ALPHHGSIAKVFQHVLNQC-SNDHCELEAMESSQYSQCRFQWLFYWLFRQPTAPFDRQLRAIYLQWKHSKRRKV : 271  
XP\_002932171.1 : ALKYHGDFTRVQSHVLCQMSMECHETLEWLVCQFRRYRFQWLFYSWLFGLSKSCARQICRIFLWKRFRFKIKV : 214

NP\_001037797.1 : STWGETICDVRVYLASLEHITRDYWRGRLARGDESIGIQTVGNYFSMCKSLVAVILGRDWGRILKRRKVVYEDTLE : 360  
Fbxxx : VSWGTTICDIRVYLASLEHITSYWRGKLAGDETVGIQTVENYFSMCKSLVAVILGRDWGRILKSKKVVYEDTLE : 344  
XP\_002932171.1 : SCWGSSICDVQYFASLEHITRDYWRGKLAGDENIGIQTVENYFSMCRSLLAWILGRKRWGRFKKRVYQDTLD : 287

NP\_001037797.1 : GYVILLRREMQLTIEHERFWQVAKVQMSRVCTLEETAVNYVNWKMIETLPYYKLYLVSGNSVYLDHVQGFILR : 433  
Fbxxx : GYVILLRREMQLTIEHERFWQVAKVQMTRVCTLEETAVNYVNWKMIETLPYYKLYLVSGNMYVYLDHVQGFILH : 417  
XP\_002932171.1 : GYVYMLRREICQSMVNHCCFWAAAKVQMMRICTLEETAGNYVNWKLIDSLFCYRLYMSGDSFYLEHIRGFLT : 360

NP\_001037797.1 : RKRLIRDWLYQENTWRPCLLEPESLYTLEFDTKISQESLHGDSVCAQLSRVMWLYLNSGQQEYLEELKANVLI : 506  
Fbxxx : RKRLVHDWEFMKENTWRVCLLEGLLYLLEFDTKISQESLHGDSMFAQLSRVMWLYLNSGQCTLYLEAVKGVLI : 490  
XP\_002932171.1 : RKQLISNWLKKEENFWWRNLLPESLEHLLYDTKIYEEERLHGDTMAAHLRLIWLWYLSGHQLYIDAMKGEVY : 433

NP\_001037797.1 : HCARVCLGQIS-VSWNSADSPETR : 529  
Fbxxx : GCACASLGHFCSSPGASIQPEVS : 514  
XP\_002932171.1 : ECANASFASQIYBSGTIISFLYF : 457
